# Supplementary material
Source: publisher site journal article supplement (https://www.dovepress.com/article/363665)
Supplement: Supplementary file 1 [file get_supplementary_file.php]

Supplementary Material

ORIGINAL RESEARCH

Yao et al

# THSD7B Mutation Induces Platinum Resistance in Small Cell Lung Cancer Patients

Zifu Yao 1,2,* ; Anqi Lin1,* ; Yonglin Yi1,* ; Weitao Shen1 ; Jian Zhang1 ; Peng Luo1

1Department of Oncology, Zhujiang Hospital, Southern Medical University, Guangzhou, 510282, Guangdong, People's Republic of China; 2The First Clinical Medical School, Nanfang Hospital, Southern Medical University, Guangzhou, 510515, Guangdong, People's Republic of China

*These authors have contributed equally to this work

Correspondence:

Jian Zhang

Email:zhangjian@i.smu.edu.cn

Peng Luo

Email:[luopeng@smu.edu.cn](mailto:luopeng@smu.edu.cn)

**A**

Zhujiang Cohort

|  | **Overall**  **(N=39)** | **THSD7B-MUT**  **(N=6)** | **THSD7B-WT**  **(N=33)** | **P** |
| --- | --- | --- | --- | --- |
| **Gender** | | | | 1 |
| Female | 5 (12.8%) | 1 (16.7%) | 4 (12.1%) |
| Male | 34 (87.2%) | 5 (83.3%) | 29 (87.9%) |
| **Age** |  |  |  | 0.213 |
| Mean(SD) | 62.8 (9.40) | 58.0 (9.87) | 63.8 (9.20) |
| Median[Min,Max] | 63.0 [46.0,89.0] | 62.0 [46.0,68.0] | 63.5 [49.0,89.0] |
| Missing | 10 (25.6%) | 1 (16.7%) | 9 (27.3%) |
| **Smoking** |  |  |  | 0.956 |
| Non-smoker | 9 (23.1%) | 1 (16.7%) | 8 (24.2%) |
| Smoker | 20 (51.3%) | 4 (66.7%) | 16 (48.5%) |
| Missing | 10 (25.6%) | 1 (16.7%) | 9 (27.3%) |

|  |
| --- |

**B**

George et al Cohort1

|  | **Overall**  **(N=101)** | **THSD7B-MUT**  **(N=15)** | **THSD7B-WT**  **(N=86)** | **P** |
| --- | --- | --- | --- | --- |
| **Gender** | | | | 0.244 |
| Female | 37(36.6%) | 8 (53.3%) | 29 (33.7%) |
| Male | 64 (63.4%) | 7 (46.7%) | 57 (66.3%) |
| **Age** |  |  |  | 0.963 |
| Mean(SD) | 64.7 (9.35) | 64.6 (13.0) | 64.7 (8.65) |
| Median[Min,Max] | 65.0 [33.0,83.0] | 64.0 [33.0,83.0] | 65.0 [44.0,83.0] |
| **UICC stage** |  |  |  | 0.669 |
| I | 34 (33.7%) | 6 (40.0%) | 28 (32.6%) |
| II | 21 (20.8%) | 2 (13.3%) | 19 (22.1%) |
| III | 27 (26.7%) | 3 (20.0%) | 24 (27.9%) |
| IV | 19 (18.8%) | 4 (26.7%) | 15 (17.4%) |
| **Smoking** |  |  |  | 0.6 |
| Non-smoker | 2 (2.0%) | 1 (6.7%) | 1 (1.2%) |
| Smoker | 92 (91.1%) | 11 (73.3%) | 81 (94.2%) |
| Missing | 7 (6.9%) | 3 (20.0%) | 4 (4.7%) |

**Supplementary Table 1. Comparison of clinical information between THSD7B-MUT and THSD7B-WT patients.**

1. Zhujiang Cohort. (B) George et al Cohort1.

Abbreviations: THSD7B-MUT: THSD7B mutant group; THSD7B-WT: THSD7B wild-type group


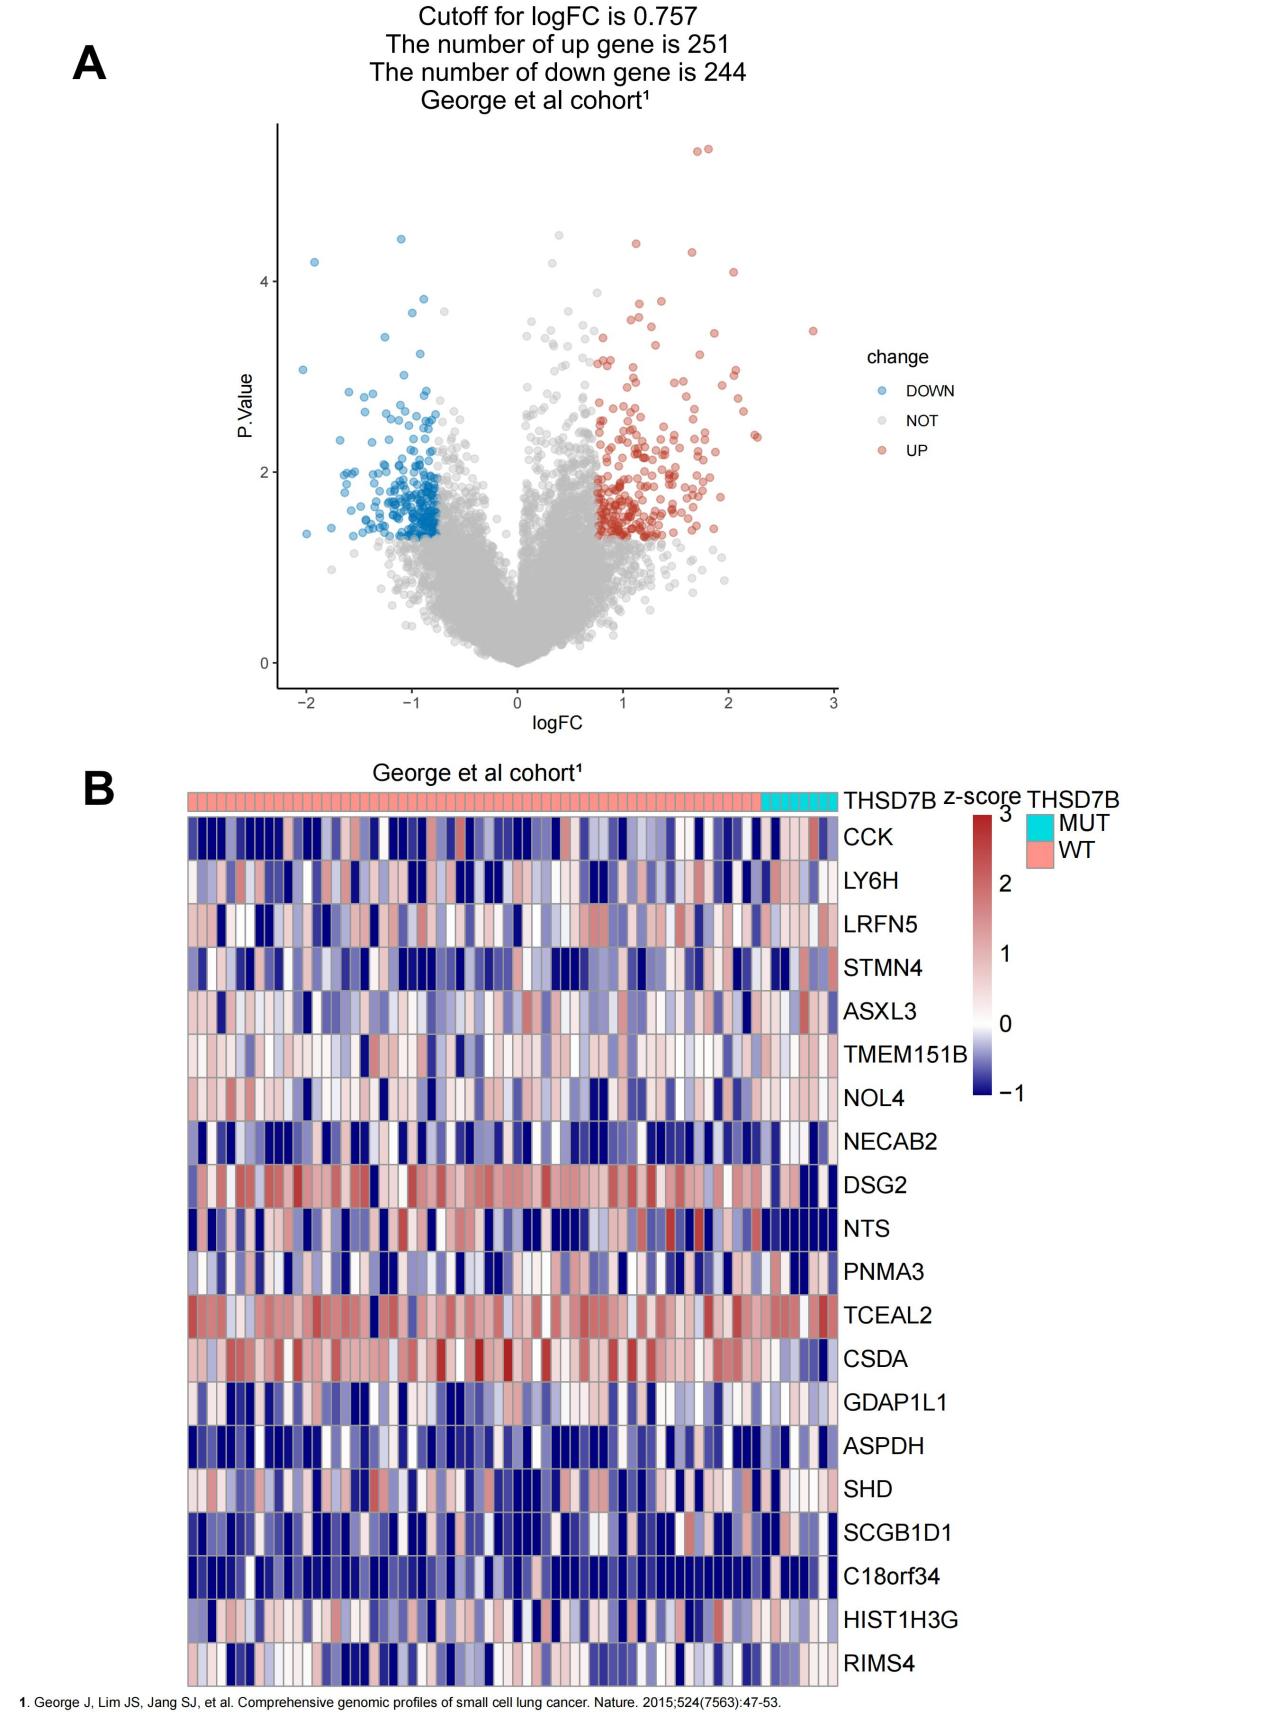


**Supplementary Figure 1.** Differentially expressed genes (DEGs) between the THSD7B-MUT and THSD7B-WT in the George et al cohort1.

1. The volcano map showed significant DEGs between the two groups (P<0.05). A total of 251 genes were up-regulated, and 244 genes were down-regulated, with logFC=0.757. (B) The heat map shows the expression of the top 20 DEGs (z-score).

Abbreviations: THSD7B-MUT: THSD7B mutant group; THSD7B-WT: THSD7B wild-type group


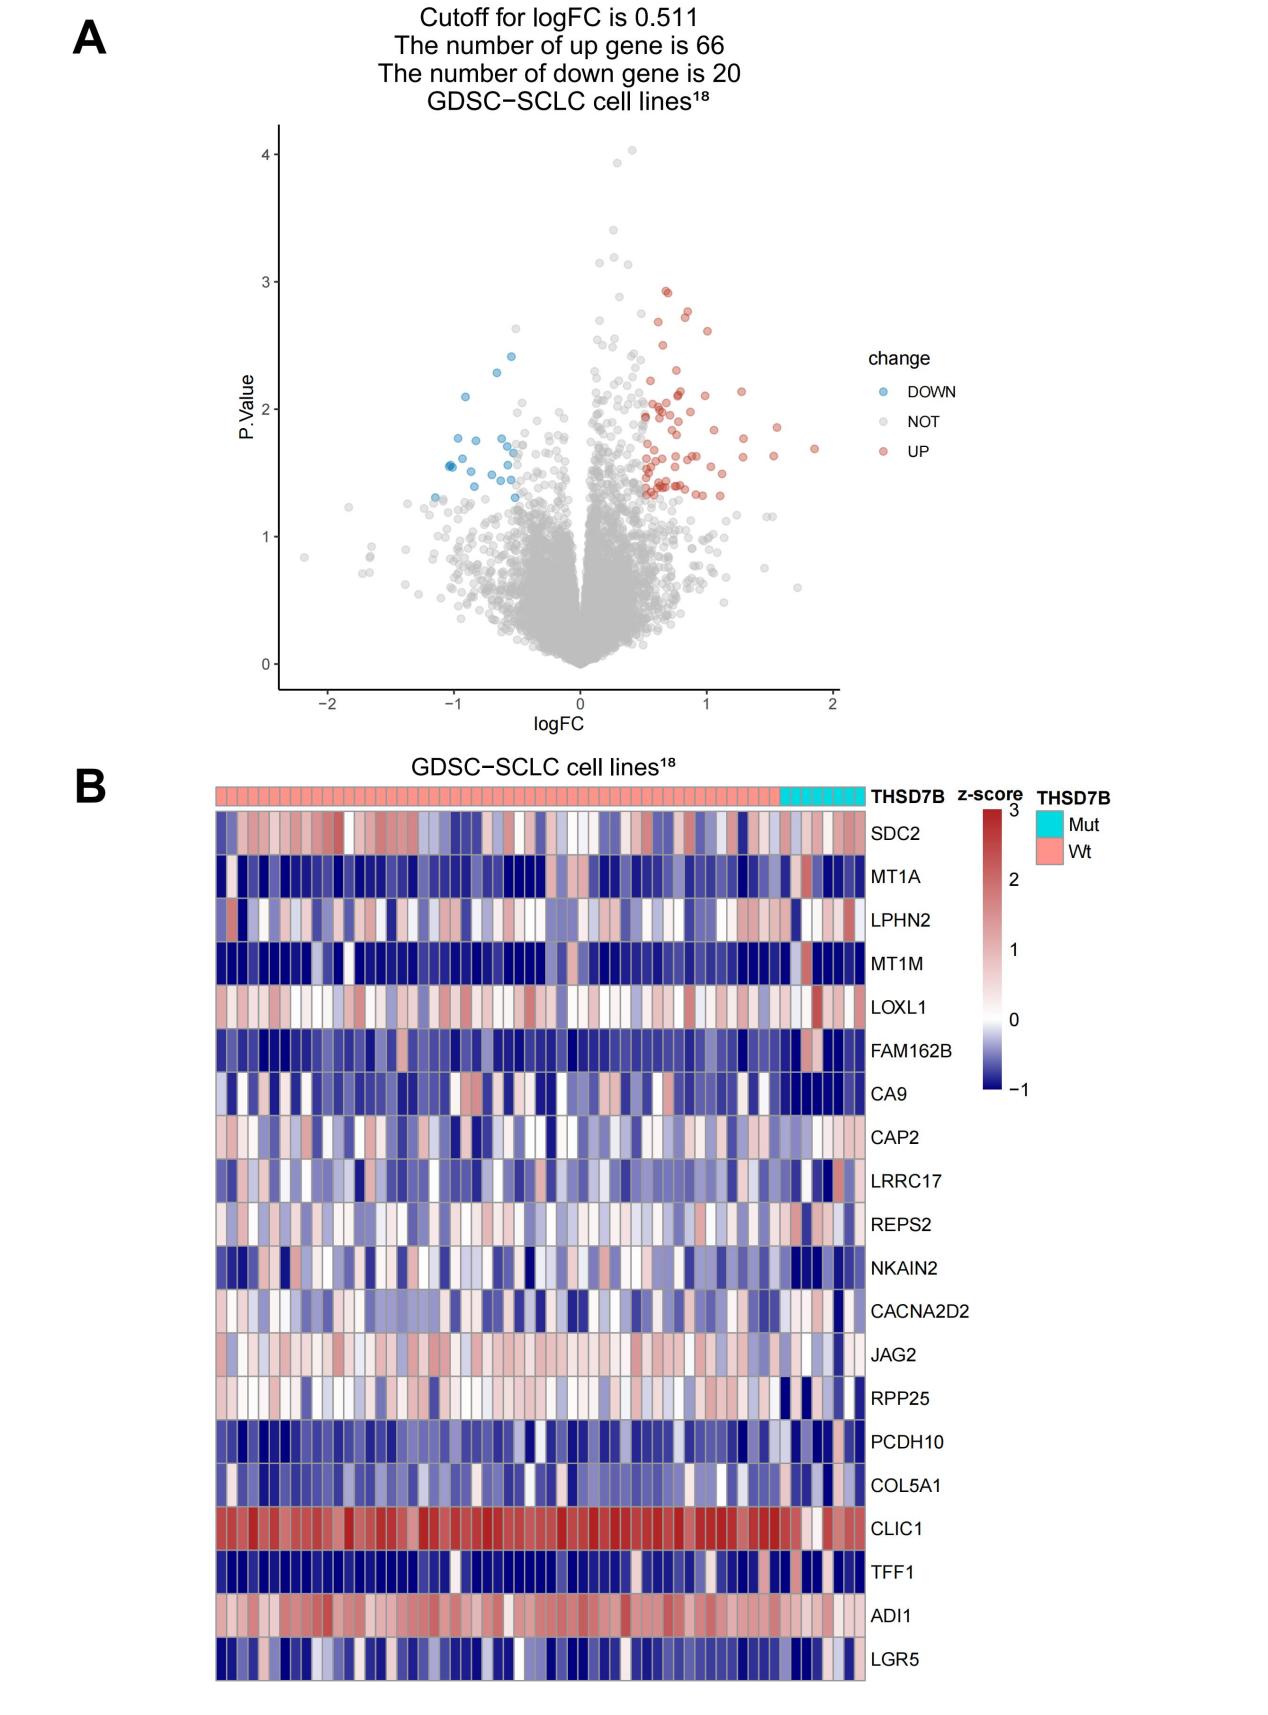


**Supplementary Figure 2.** Differentially expressed genes (DEGs) between the THSD7B-MUT and THSD7B-WT in GDSC-SCLC cell lines18.

1. The volcano map showed significant DEGs between the two groups (P<0.05). A total of 60 genes were up-regulated, and 22 genes were down-regulated, with logFC=0.511. (B) The heat map shows the expression of the top 20 DEGs (z-score).

Abbreviation: GDSC: Genomics of Drug Sensitivity in Cancer; SCLC: small cell lung cancer

**
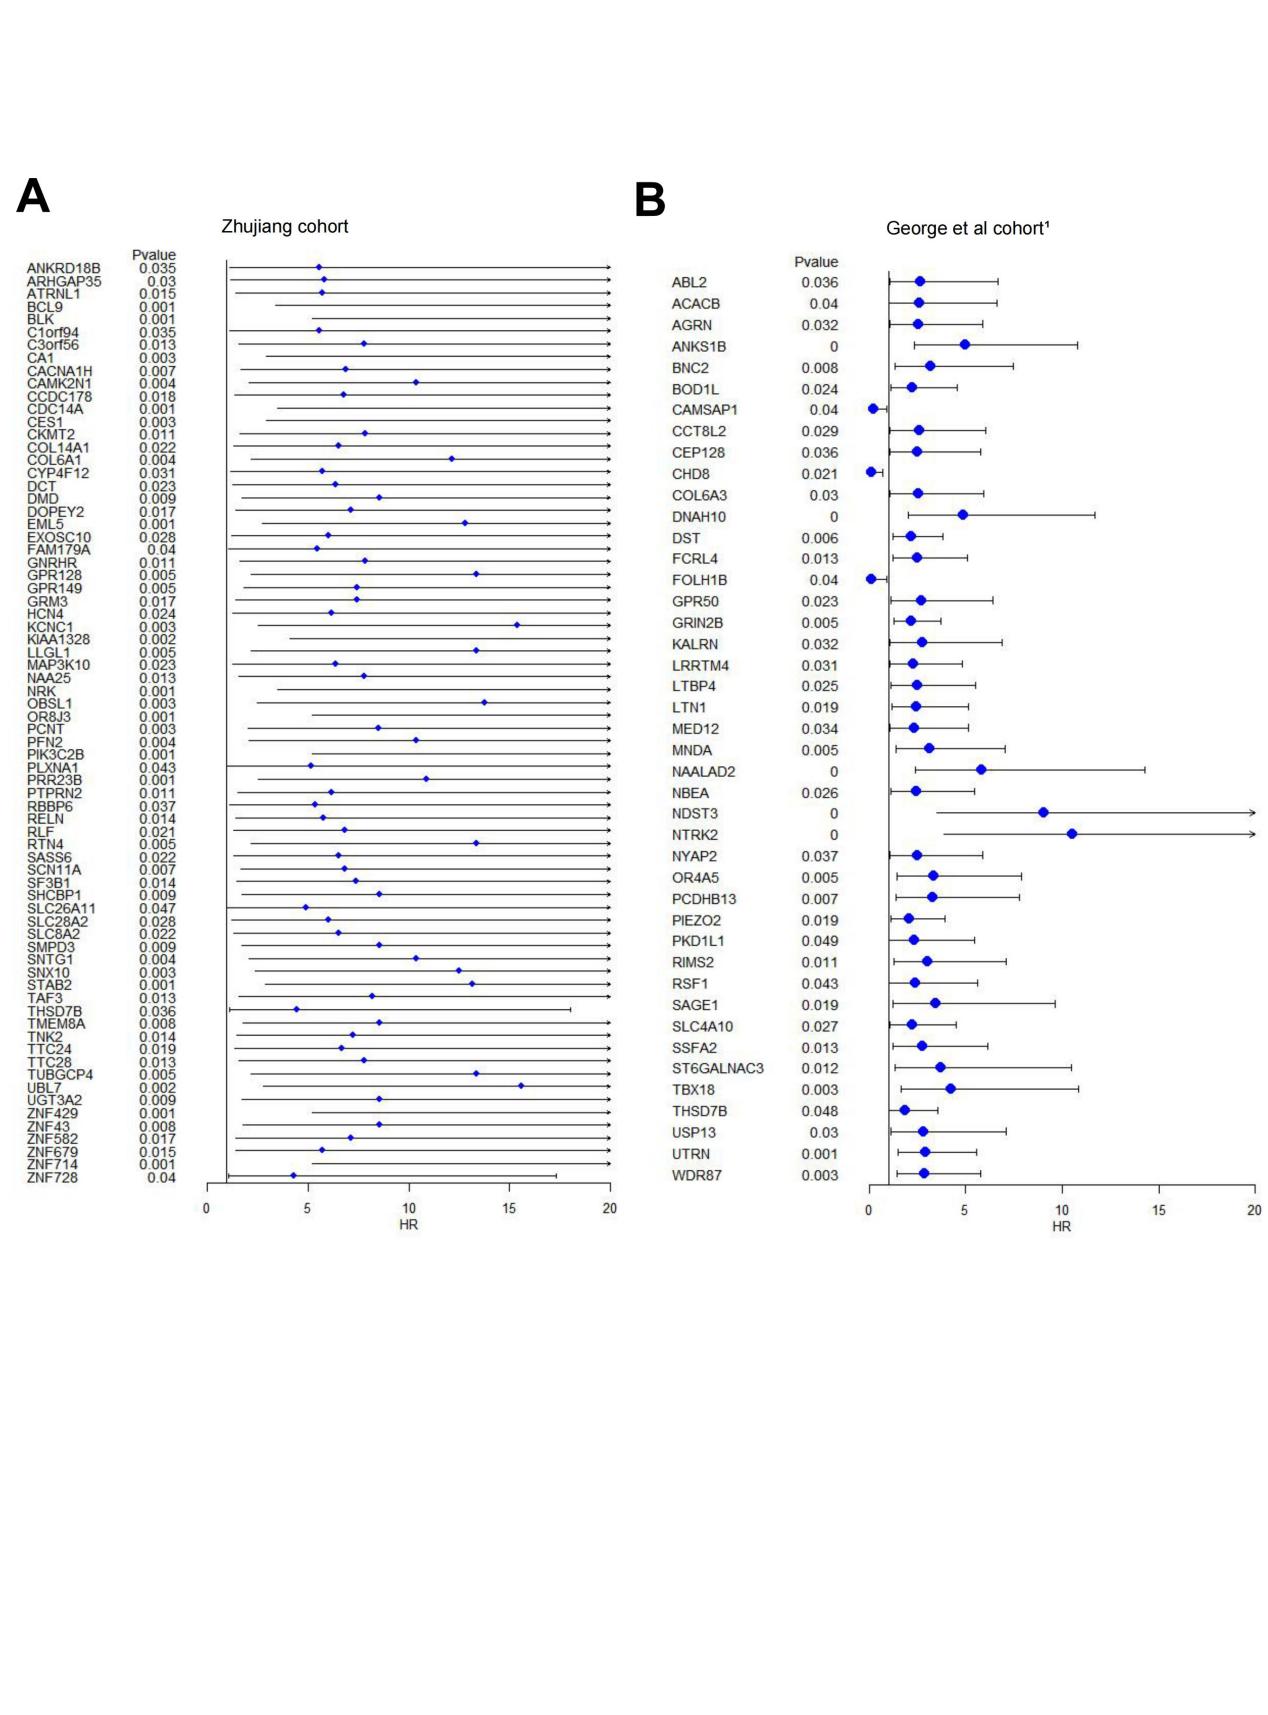
**

**Supplementary Figure 3.** Univariate cox proportional hazard regression model of mutant genes significantly related to OS in SCLC patients treated with platinum.

1. & (B) There are 71 mutant genes and 42 mutant genes that are significantly related to the OS of platinum-resistant patients in the Zhujiang cohort and George et al cohort1, respectively. The mutation frequency was more than 5%, and the significance was P<0.05.

Abbreviation: OS: overall survival; SCLC: small cell lung cancer


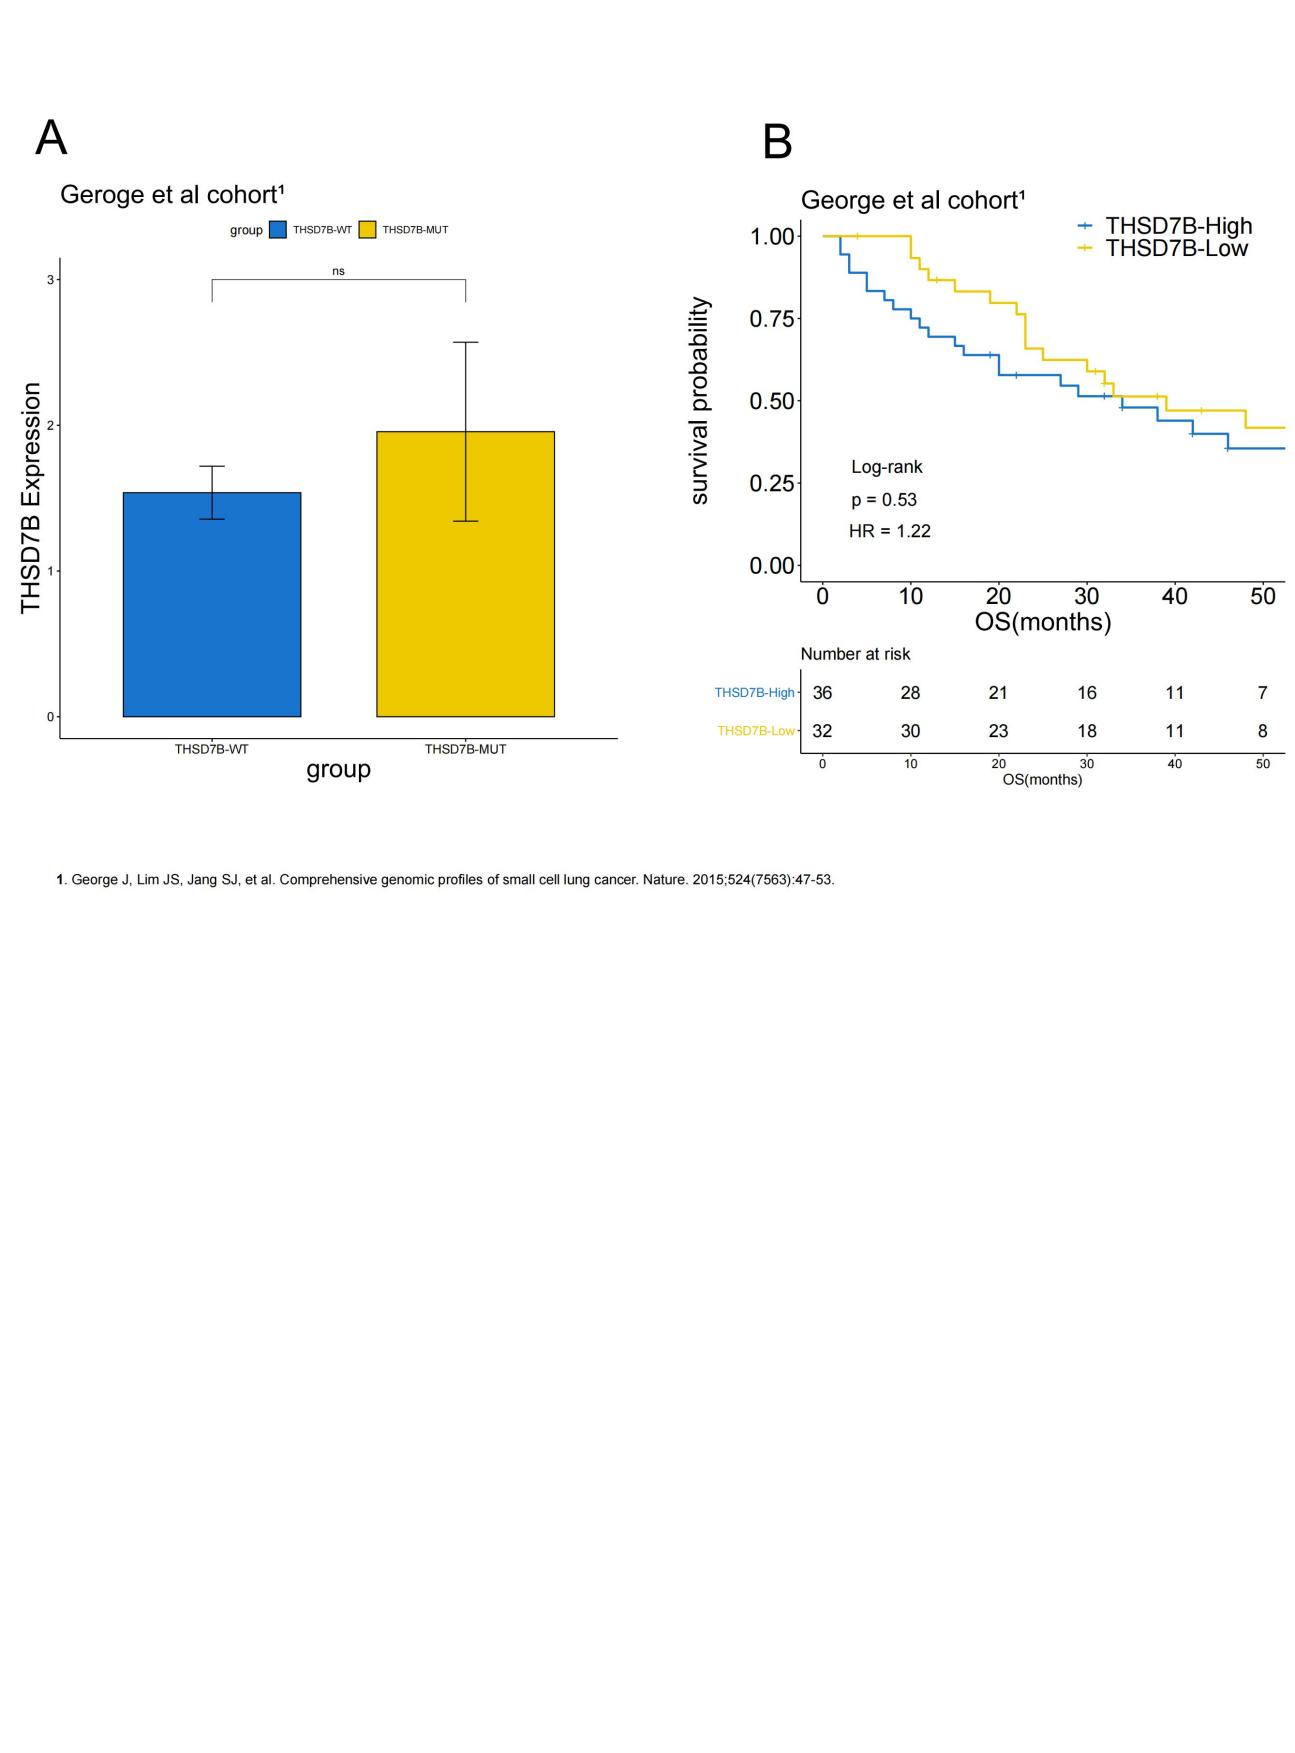


**Supplementary Figure 4**. The relationship of THSD7B expression, THSD7B mutation and the OS of patients in George et al cohort1. (A) There was no significant relationship between THSD7B expression and THSD7B mutation (Wilcox test, P>0.05). (B) There was no significant relationship between THSD7B expression and the OS of SCLC patients (Kaplan-Meier test, P=0.53).

Abbreviation: OS: overall survival; SCLC: small cell lung cancer
